# Supplementary material
Source: PubMed Central journal article supplement (PMC4279086)
Supplement: supp_114.060103_Supplemental_1.pdf [file supp_114.060103_Supplemental_1.pdf]

Title: Identification of a Functional Antioxidant Response Element within the Eighth Intron of the Human *ABCC3* Gene

Authors: Mark J. Canet, Matthew D. Merrell, Bryan G. Harder, Jonathan M. Maher, Tongde Wu, Andrew J. Lickteig, Jonathan P. Jackson, Donna D. Zhang, Masayuki Yamamoto, Nathan J. Cherrington

Journal Title: Drug Metabolism and Disposition

### **Supplemental Figure 1**

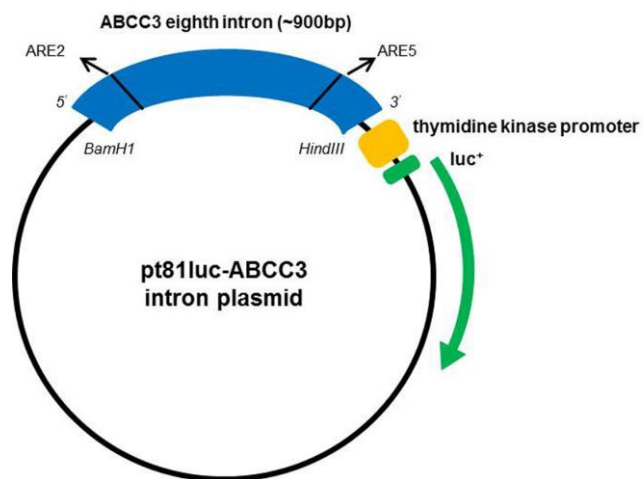

*Supplemental Figure 1. Schematic of *pt81luc-ABCC3* intron plasmid.* A portion of the *ABCC3* intron (blue) was directionally cloned into the *pt81luc* reporter plasmid using *Bam*H1 and *Hind*III restriction sites upstream of the thymidine kinase promoter (yellow) and luciferase gene (green). Relative locations of ARE2 (~250 bp from 5' end) and ARE5 (~800 bp from 5' end) are represented by a black line within the cloned intron region.
